# Supplementary material
Source: HighWire-hosted journal article supplement (https://jpet.aspetjournals.org/content/suppl/2010/09/01/jpet.110.172544)
Supplement: JPET172544_Supplemental_Figure_1.pdf [file JPET172544_Supplemental_Figure_1.pdf]

1 Identification and characterisation of novel NMDA receptor antagonists selective for  
2 NR2A- over NR2B-containing receptors  
3  
4 Authors: Ezio Bettini, Anna Sava, Cristiana Griffante, Corrado Carignani, Alberto Buson,  
5 Anna Maria Capelli, Michele Negri, Filippo Andreetta, Sergio A Senar-Sancho, Lorena  
6 Guiral and Francesca Cardullo  
7  
8 Journal of Pharmacological and Experimental Therapeutics  
9  
10 Supplemental Figure 1

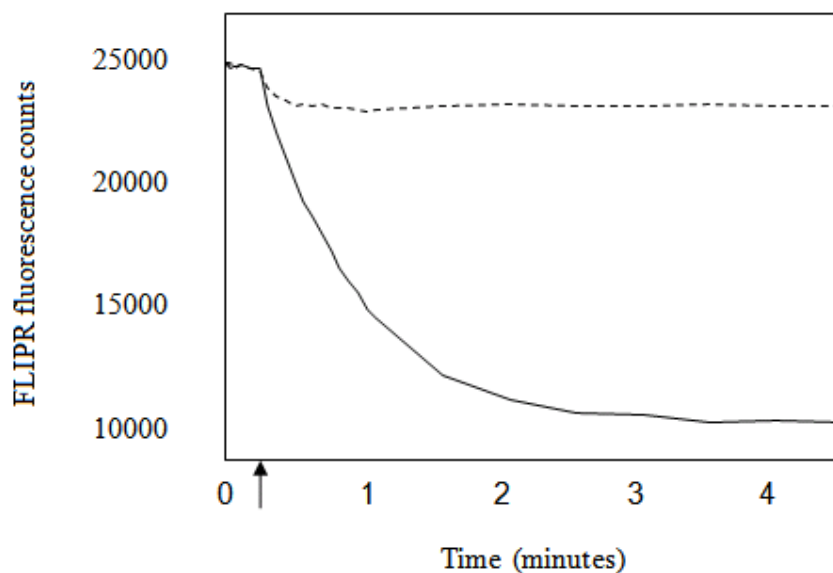

11  
12 Typical traces obtained in NR1/NR2A FLIPR/ $\text{Ca}^{2+}$  experiment: arrow indicates  
13 compound addition time: 33  $\mu\text{M}$  memantine (solid line), or DMSO (dashed line).  
14 Similar inhibitory traces were obtained for other antagonists or in NR1/NR2B  
15 FLIPR/ $\text{Ca}^{2+}$  assay.
